# Supplementary material
Source: PubMed Central journal article supplement (PMC6649140)
Supplement: ao8b02747_si_001.pdf [file ao8b02747_si_001.pdf]

**Synthesis of Positively and Negatively charged CeO<sub>2</sub> Nanoparticles: Investigation of the Role of Surface Charge on Growth and Development of *Drosophila Melanogaster***

Divya Parimit<sup>1</sup>, Vignesh Sundararajan<sup>2</sup>, Omer Sadak<sup>3</sup>, Sundaram Gunasekaran<sup>3,4</sup>, Sahabudeen Sheik Mohideen<sup>2</sup>, Anandhakumar Sundaramurthy<sup>1,5\*</sup>

<sup>1</sup>Department of Physics and Nanotechnology, SRM Institute of Science and Technology, Kattankulathur - 603203, Kanchipuram, Tamil Nadu, India.

<sup>2</sup>Department of Biotechnology, SRM Institute of Science and Technology, Kattankulathur - 603203, Kanchipuram, Tamil Nadu, India.

<sup>3</sup>Department of Materials Science and Engineering, University of Wisconsin-Madison, Madison, Wisconsin 53706, USA.

<sup>4</sup>Department of Biological Systems Engineering, University of Wisconsin-Madison, Madison, Wisconsin 53706, USA.

<sup>5</sup>SRM Research Institute, SRM Institute of Science and Technology, Kattankulathur - 603203, Kanchipuram, Tamil Nadu, India.

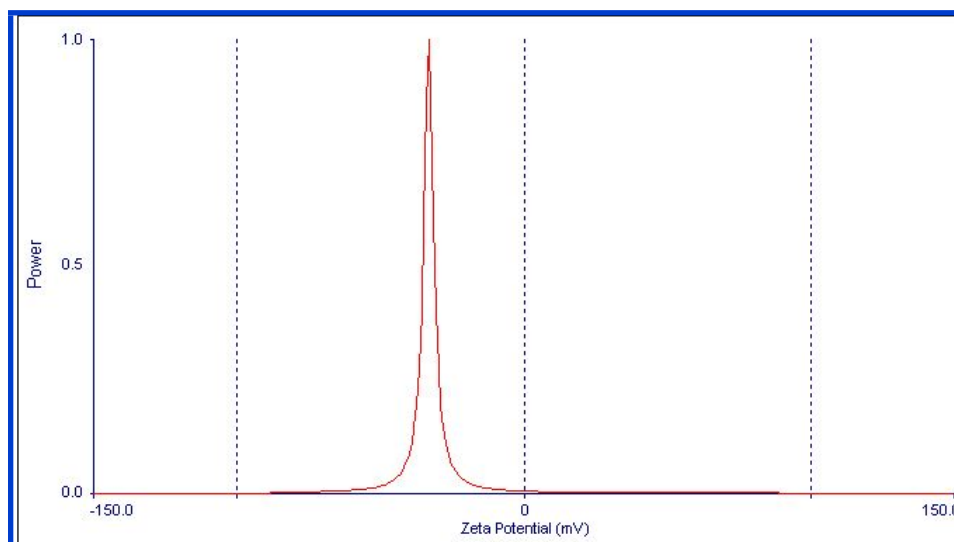

Figure S1. Zeta potential measurements of cerium oxide NPs stabilized with HMT.

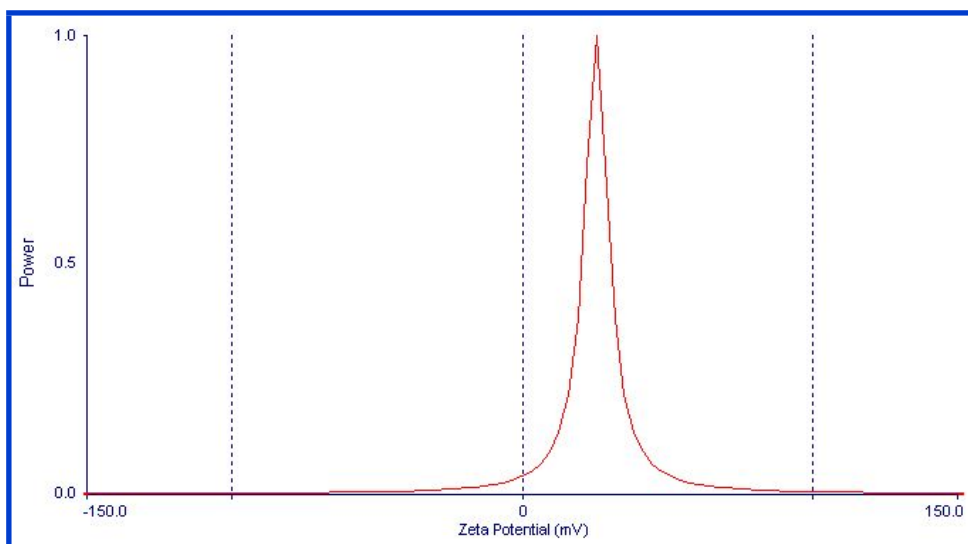

Figure S2. Zeta potential measurements of cerium oxide NPs stabilized with PVP.

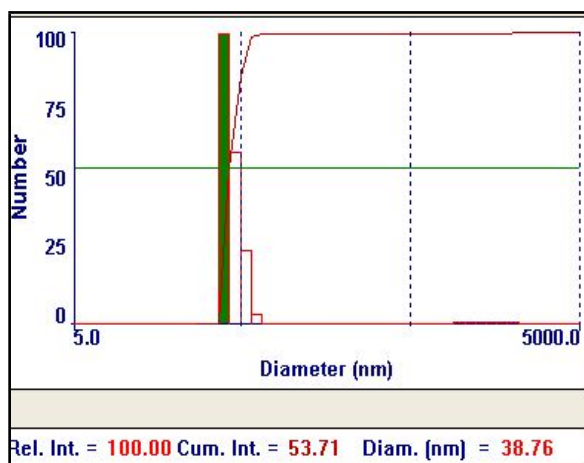

Figure S3. DLS measurements show the size of cerium oxide NPs at 5 h of synthesis process.

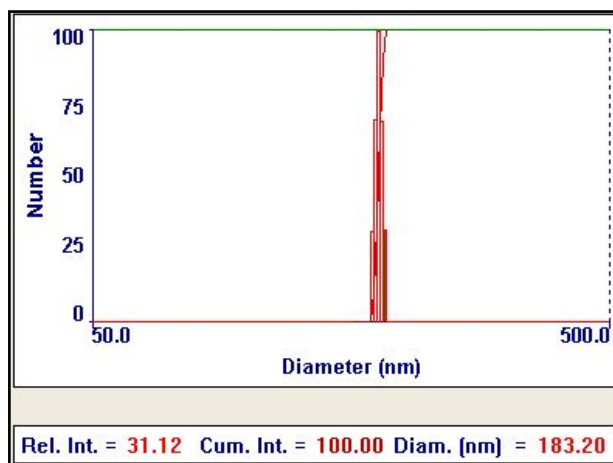

Figure S4. DLS measurements show the size of cerium oxide NPs at 10 h of synthesis process.

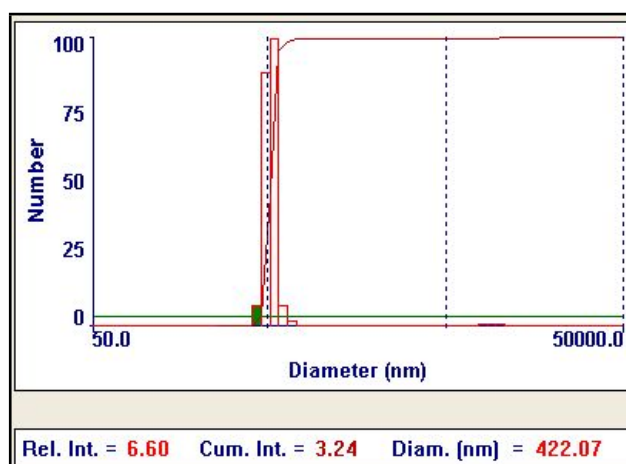

Figure S5. DLS measurements show the size of cerium oxide NPs at 30 h of synthesis process.
